# Supplementary material for: Effect of Cancer-Related Cachexia and Associated Changes in Nutritional Status, Inflammatory Status, and Muscle Mass on Immunotherapy Efficacy and Survival in Patients with Advanced Non-Small Cell Lung Cancer
Source: Cancers (Basel). 2023 Feb 8;15(4):1076. doi: 10.3390/cancers15041076 (PMC9953791; doi:10.3390/cancers15041076)
Supplement: Supplementary file 1 [file cancers-15-01076-s001.zip › cancers-2144442-supplementary.pdf]

## Supplementary files

### Methods S1. Calculation of LBM and SMI based on the equations provided by Mourtzakis et al [39]

$$\text{LBM/total skeletal muscle cross-sectional area (TMA) (kg)} = 0.3 \times \text{skeletal muscle area at L3 (TMA) (cm}^2\text{)} + 6.06 \quad (1)$$

$$\text{Fat mass (FM) (kg)} = 0.042 \times \text{total fat tissue area at L3 (cm}^2\text{)} + 11.2 \quad (2)$$

Subsequently, both parameters were corrected to individual patient height using the following formulas:

$$\text{Fat-free mass (FFM) index (FFMI; kg/m}^2\text{)} = \text{Total FFM/height squared (m}^2\text{)} \quad (3)$$

$$\text{FM index (FMI; kg/m}^2\text{)} = \text{Total FM/height squared (m}^2\text{)} \quad (4)$$

For the assessment of sarcopenia, we calculated the SMI (which is the cross-sectional area of the bilateral psoas muscles at L3) by dividing LBM/TMA at L3 by the height squared:

$$\text{SMI (cm}^2\text{/m}^2\text{)} = \text{TMA at L3/height squared (m}^2\text{)} \quad (5)$$

**Figure S1**

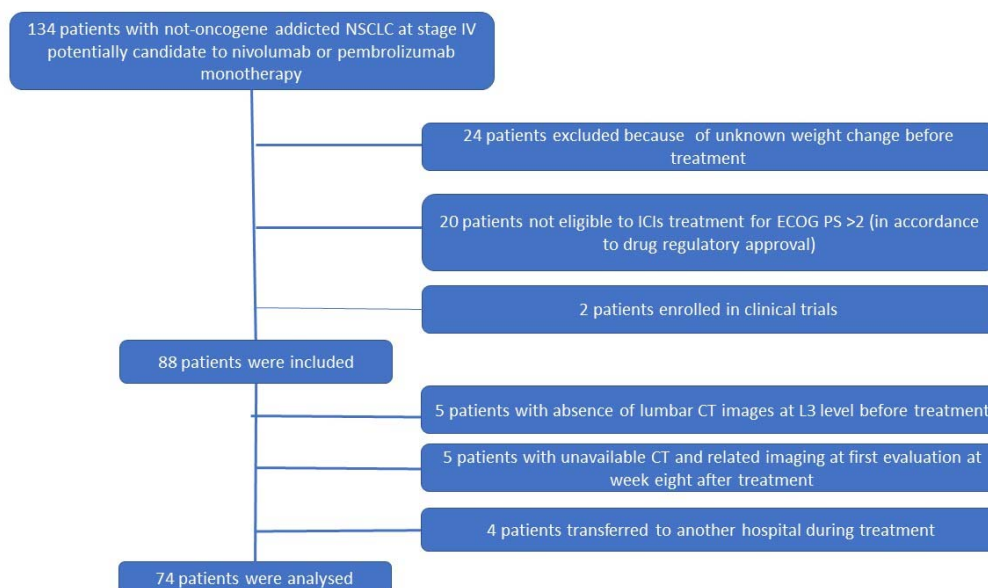

**Figure S1. Flow diagram of the study.** Abbreviations: NSCLC, non-small-cell lung cancer; ECOG PS, Eastern Cooperative Oncology Group Performance Status; CT, computed tomography

**Table S1.** Analysis of miniCASCO Score and its subscales at baseline.

| Parameters          | Mean±SD (range)    |
|---------------------|--------------------|
| miniCASCO           | 32.5 ± 16.4 (6-73) |
| miniCASCO subscales |                    |
| BWC                 | 8.3 ± 2 (0-40)     |
| IMD                 | 7.9 ± 2.2 (0-16)   |
| PHP                 | 8.3 ± 4.9 (0-15)   |
| Anorexia            | 4.9 ± 2.9 (0-20)   |
| QoL                 | 4.1 ± 1.7 (2-10)   |

Data are reported as mean ±standard deviation (SD). Abbreviations: BWC, bodyweight composition/change; IMD, inflammation/metabolic disturbances/immunosuppression; PHP, physical performance (PHP); QoL, quality of life.

**Table S2.** Univariate COX-regression analysis of variables determinants of PFS.

| PFS                                   |               |                           |                   |
|---------------------------------------|---------------|---------------------------|-------------------|
| Variables                             | b coefficient | Exp (b); 95%CI            | p value           |
| Baseline weight loss %                | 0.01218       | 1.0123 (0.9544 to 1.0736) | 0.6849            |
| Cachexia according to Fearon criteria | 0.3008        | 1.3509 (0.7773 to 2.3480) | 0.2861            |
| LBM                                   | 0.01933       | 1.0195 (0.9876 to 1.0525) | 0.2338            |
| SMI                                   | 0.01921       | 1.0194 (0.9971 to 1.0422) | 0.0885            |
| C-reactive protein                    | 0.00252       | 1.0025 (0.9964 to 1.0086) | 0.4165            |
| IL-6                                  | 0.03155       | 1.0321 (1.0176 to 1.0468) | <b>&lt;0.0001</b> |
| Neutrophils count                     | 0.0000071     | 1.0000 (0.9999 to 1.0001) | 0.8996            |
| Lymphocyte count                      | 0.000406      | 1.0004 (0.9999 to 1.0009) | 0.1222            |
| NLR                                   | -0.03765      | 0.9630 (0.8473 to 1.0946) | 0.5644            |
| Albumin                               | -0.06222      | 0.9397 (0.4607 to 1.9166) | 0.8642            |
| mGPS                                  | 0.4079        | 1.5037 (1.1087 to 2.0396) | <b>0.0087</b>     |
| Hemoglobin                            | -0.07542      | 0.9274 (0.8045 to 1.0690) | 0.2983            |
| MiniCASCO score                       | 0.07253       | 1.0752 (1.0137 to 1.1405) | <b>0.0159</b>     |
| Anorexia subscale                     | -0.01862      | 0.9816 (0.9330 to 1.0327) | 0.4722            |
| IMD subscale                          | 0.09010       | 1.0943 (1.0277 to 1.1652) | <b>0.0049</b>     |
| BWC subscale                          | 0.00326       | 1.0033 (0.9800 to 1.0271) | 0.7854            |
| PHP subscale                          | 0.01395       | 1.0140 (0.9983 to 1.0330) | 0.0807            |
| QoL subscale                          | 0.1862        | 1.2046 (1.0516 to 1.3799) | <b>0.0072</b>     |
| MiniCASCO-based cachexia severity     | 0.2510        | 1.2854 (1.1244 to 1.7075) | <b>0.0083</b>     |

Significant p values (<0.05) are reported in bold. Abbreviations: PFS, Progression-Free Survival; LBM, lean body mass; SMI, skeletal mass index; IL, Interleukin; NLR, neutrophil-to-lymphocyte ratio; mGPS, modified Glasgow Prognostic Score; BWC, bodyweight composition/change; IMD, inflammation/metabolic disturbances/immunosuppression; PHP, physical per-formance (PHP); QoL, quality of life.

**Table S3. Univariate COX-regression analysis of variables determinants of OS.**

| OS                                    |               |                           |                   |
|---------------------------------------|---------------|---------------------------|-------------------|
| Variables                             | b coefficient | Exp (b) (95%CI)           | p value           |
| Baseline weight loss %                | 0.04044       | 1.0413 (0.9802 to 1.1062) | 0.1897            |
| Cachexia according to Fearon criteria | 0.1306        | 1.1396 (1.4632 to 1.8875) | <b>0.0306</b>     |
| LBM                                   | 0.01849       | 1.0187 (0.9847 to 1.0538) | 0.2852            |
| SMI                                   | 0.02162       | 1.0219 (0.9967 to 1.0477) | 0.0895            |
| C-reactive protein                    | 0.004677      | 1.0047 (0.9984 to 1.0110) | 0.1412            |
| IL-6                                  | 0.03825       | 1.0390 (1.0213 to 1.0570) | <b>&lt;0.0001</b> |
| Neutrophils count                     | 0.00007124    | 1.0001 (1.000 to 1.0002)  | 0.2054            |
| Lymphocyte count                      | 0.0002870     | 1.0003 (0.9998 to 1.0008) | 0.2617            |
| NLR                                   | 0.01045       | 1.0105 (0.8892 to 1.1484) | 0.8728            |
| Albumin                               | -0.03547      | 0.9652 (0.4602 to 2.0243) | 0.9252            |
| mGPS                                  | 0.4847        | 1.6237 (1.1771 to 2.2396) | <b>0.0031</b>     |
| Hemoglobin                            | -0.06254      | 0.9394 (0.8082 to 1.0919) | 0.9394            |
| MiniCASCO score                       | 0.1619        | 1.0163 (1.0341 to 1.9989) | <b>0.0047</b>     |
| Anorexia subscale                     | -0.000003     | 1.000 (0.9502 to 1.0524)  | 0.9999            |
| IMD subscale                          | 0.1021        | 1.1075 (1.0300 to 1.1908) | <b>0.0058</b>     |
| BWC subscale                          | 0.009881      | 1.0099 (0.9845 to 1.0360) | 0.4472            |
| PHP subscale                          | 0.05954       | 1.0613 (0.9944 to 1.1328) | 0.0732            |
| QoL subscale                          | 0.1287        | 1.1374 (0.9658 to 1.3395) | 0.1229            |
| MiniCASCO-based cachexia severity     | 0.6540        | 1.9233 (1.0252 to 3.6080) | <b>0.0416</b>     |

Significant p values (<0.05) are reported in bold. Abbreviations: OS, Overall Survival; LBM, lean body mass; SMI, skeletal mass index; IL, Interleukin; NLR, neutrophil-to-lymphocyte ratio; mGPS, modified Glasgow Prognostic Score; BWC, bodyweight composition/change; IMD, inflammation/metabolic disturbances/immunosuppression; PHP, physical performance (PHP); QoL, quality of life.

## RESULTS S1

*Association of cachexia status, miniCASCO, body composition, inflammatory status, and nutritional status with survival outcomes*

The correlation analysis demonstrated a statistically significant inverse correlation between PFS and CRP level ( $r = -0.3333$ ; 95% CI, -0.529 to -0.103;  $p = 0.0055$ ), IL-6 level ( $r = -0.649$ ; 95% CI, -0.775 to -0.472;  $p < 0.0001$ ), and miniCASCO ( $r = -0.210$ ; 95% CI, -0.3679 to -0.0019;  $p = 0.0418$ ). Regarding miniCASCO subscale scores, PFS elicited an inverse significant correlation with IMD ( $r = -0.324$ ; 95% CI, -0.522 to -0.0932;  $p = 0.0070$ ) and QoL ( $r = -0.309$ ; 95% CI, -0.510 to -0.0761;  $p = 0.0104$ ) subscale scores. Results of correlation analysis are reported in Table S4.

**Table S4. Correlation analysis between parameters of cachexia status, body composition/nutritional status, inflammatory status, and miniCASCO with survival outcomes (PFS and OS).**

| Parameters             | PFS                        |                   | OS                         |                   |
|------------------------|----------------------------|-------------------|----------------------------|-------------------|
|                        | r coefficient (CI 95%)     | p value           | r coefficient (CI 95%)     | p value           |
| Baseline weight loss % | -0.0996 (-0.334 to 0.146)  | 0.4262            | -0.165 (-0.392 to 0.0798)  | 0.1843            |
| LBM                    | 0.150 (-0.2060 to 0.04952) | 0.226             | 0.250 (0.2727 to 0.004086) | <b>0.0436</b>     |
| SMI                    | 0.0917 (0.323 to -0.150)   | 0.4571            | 0.275 (0.481 to 0.0387)    | <b>0.0235</b>     |
| C-reactive protein     | -0.333 (-0.529 to -0.103)  | <b>0.0055</b>     | -0.388 (-0.574 to -0.165)  | <b>0.0011</b>     |
| IL-6                   | -0.649 (-0.775 to -0.472)  | <b>&lt;0.0001</b> | -0.628 (-0.760 to -0.444)  | <b>&lt;0.0001</b> |
| Neutrophils count      | -0.222 (-0.437 to 0.0172)  | 0.0686            | -0.346 (-0.540 to -0.117)  | <b>0.0039</b>     |
| Lymphocyte count       | 0.210 (-14.6686 to 0.9789) | 0.085             | 0.250 (0.4288 to 0.02784)  | <b>0.0446</b>     |

|                   |                             |               |                            |               |
|-------------------|-----------------------------|---------------|----------------------------|---------------|
| NLR               | 0.0692 (-0.172 to 0.303)    | 0.5748        | -0.0913 (-0.323 to 0.150)  | 0.4591        |
| Albumin           | 0.0597 (-0.181 to 0.294)    | 0.6287        | 0.0614 (-0.180 to 0.295)   | 0.6190        |
| Hemoglobin        | 0.116 (-0.126 to 0.345)     | 0.3458        | 0.152 (-0.0895 to 0.377)   | 0.2153        |
| MiniCASCO score   | -0.210 (-0.3679 to -0.0119) | <b>0.0418</b> | -0.252 (-0.463 to -0.0144) | <b>0.0382</b> |
| Anorexia subscale | 0.185 (-0.0559 to 0.406)    | 0.1309        | 0.253 (0.0157 to 0.464)    | <b>0.0372</b> |
| IMD subscale      | -0.324 (-0.522 to -0.0932)  | <b>0.0070</b> | -0.462 (-0.631 to -0.251)  | <b>0.0001</b> |
| BWC subscale      | -0.145 (-0.371 to 0.0969)   | 0.2384        | -0.131 (-0.358 to 0.111)   | 0.2868        |
| PHP subscale      | -0.0931 (-0.324 to 0.149)   | 0.4503        | -0.182 (-0.403 to 0.0586)  | 0.1366        |
| QoL subscale      | -0.309 (-0.510 to -0.0761)  | <b>0.0104</b> | -0.352 (-0.545 to -0.124)  | <b>0.0032</b> |

Significant p values (<0.05) are reported in bold. Abbreviations: LBM, lean body mass, SMI, skeletal mass index; IL, Interleukin; NLR, neutrophil-to-lymphocyte ratio; BWC, bodyweight composition/change; IMD, inflammation/metabolic disturbances/immunosuppression; PHP, physical per-formance (PHP); QoL, quality of life.

Among categorical variables, we found a significant difference in PFS between mGPS ( $p=0.005$ ) and miniCASCO-based cachexia severity severity ( $p<0.001$ ) categories (Figure S2).

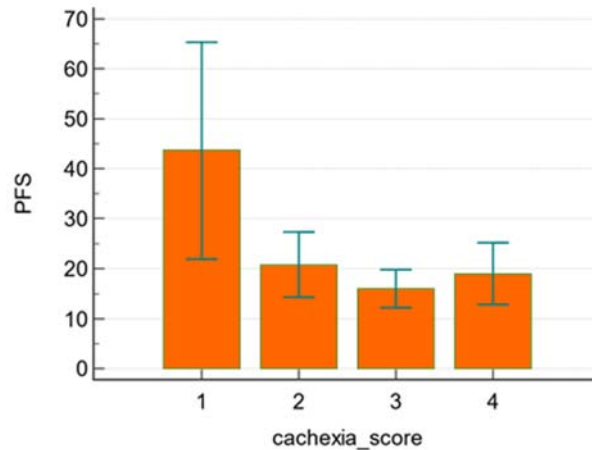

**Figure S2. Comparison of progression-free survival according to cachexia severity.** Progression-free survival (PFS) was significantly different among patients with different categories of cachexia severity assessed by miniCASCO. Groups were compared by ANOVA test ( $p<0.001$ ).

Furthermore, we found a statistically significant inverse correlation of OS with CRP level ( $r= -0.388$ ; 95% CI, -0.574 to -0.165;  $p=0.0011$ ), IL-6 level ( $r= -0.628$ ; 95% CI, -0.760 to -0.444;  $p<0.0001$ ), neutrophil absolute count ( $r= -0.346$ ; 95% CI, -0.540 to -0.117;  $p=0.0039$ ), mGPS ( $r= -0.364$ ; 95% CI, -0.555 to -0.138;  $p=0.0023$ ), miniCASCO score ( $r= -0.252$ ; 95% CI, -0.463 to -0.0144;  $p= 0.0382$ ), and miniCASCO subscale scores (IMD [ $r= -0.462$ ; 95% CI, -0.631 to -0.251;  $p=0.0001$ ] and QoL [ $r= -0.352$ ; 95% CI, -0.545 to -0.124;  $p=0.032$ ]). A positive significant correlation was found between OS and LBM ( $r=0.250$ ; 95% CI, 0.2727 to 0.004086;  $p=0.0436$ ), SMI ( $r=0.275$ ; 95% CI, 0.481 to 0.0387;  $p=0.0235$ ), lymphocyte absolute count ( $r= 0.250$ ; 95% CI 0.4288 to 0.02784;  $p=0.0446$ ), and

anorexia subscale score ( $r=0.253$ ; 95% CI, 0.0157 to 0.464;  $p=0.0372$ ). Results of correlation analysis are reported in Supplementary Table S4.

Among categorical variables we found a significant difference (by Kruskal-Wallis test) in OS in terms of mGPS ( $p=0.0107$ ), the presence of sarcopenia ( $p=0.0197$ ), and miniCASCO-based cachexia severity ( $p=0.023$ ) (Figure S3).

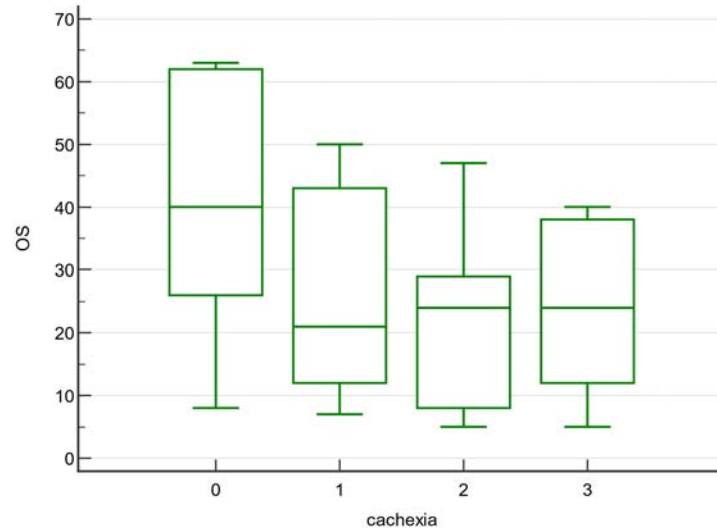

**Figure S3. Comparison of overall survival according to cachexia severity.** Overall survival (OS) was significantly different among patients with different categories of cachexia severity assessed by miniCASCO. Groups were compared by Kruskal-Wallis test ( $p=0.023$ ).

**Figure S4.**

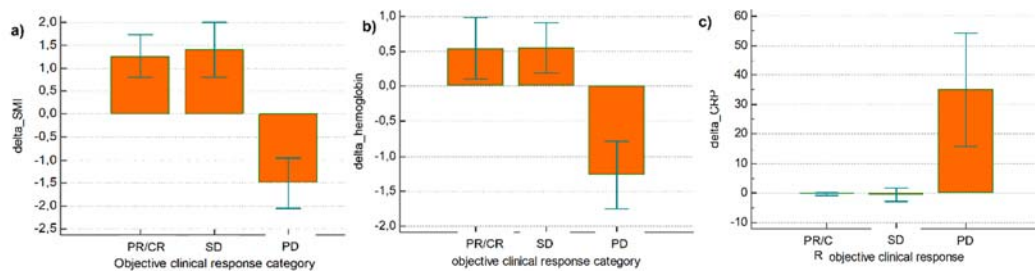

**Figure S4. Changes of skeletal muscle index (SMI), hemoglobin and C-reactive Protein (CRP) values during treatment according to objective clinical response categories.** a) patients with progression of disease (PD) had a significantly different decrease in SMI in comparison to patients with partial response (PR)/complete response (CR) and stable disease (SD) ( $p=0.003$ ); b) patients with PD had a significantly different decrease in hemoglobin than patients with PR/CR and SD ( $p=0.011$ ); c) patients with PD had a significantly different increase in C-reactive protein (CRP) levels in comparison to patients with PR/CR and SD ( $p=0.008$ ). Differences between categories were calculated by ANOVA test.
